# Supplementary material for: Dauricine Protects from LPS-Induced Bone Loss via the ROS/PP2A/NF-κB Axis in Osteoclasts
Source: PubMed Central journal article supplement (PMC7402093; doi:10.3390/antiox9070588), 2020-07-06
Supplement: antioxidants-09-00588-s001.pdf [file antioxidants-09-00588-s001.pdf]

1

2 **Supplementary Figure 1.** DAC attenuates LPS-induced bone loss in mice.

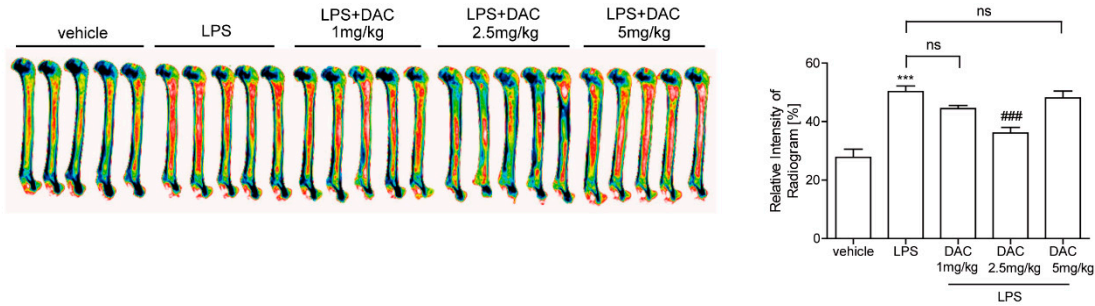

3

4 Representative images and relative intensities of the distal femurs from X-ray radiograms mice treated  
 5 with PBS (n=5), LPS (5 mg/kg/week) (n = 5), or LPS+DAC (1.0 mg/kg/d; n=5, 2.5 mg/kg/d; n=5, 5  
 6 mg/kg/d; n=5) were measured using the Image J program. Bone density: blue>green>yellow>red>white.  
 7 \*\*\*  $p < 0.001$  compared with PBS-treated mice. ###  $p < 0.001$  compared with LPS-treated mice. ns, no  
 8 significant difference between 2 samples. Similar results were obtained in three independent  
 9 experiments.

10

11 **Supplementary Figure 2.** DAC does not show any significant change in LPS-treated mice.

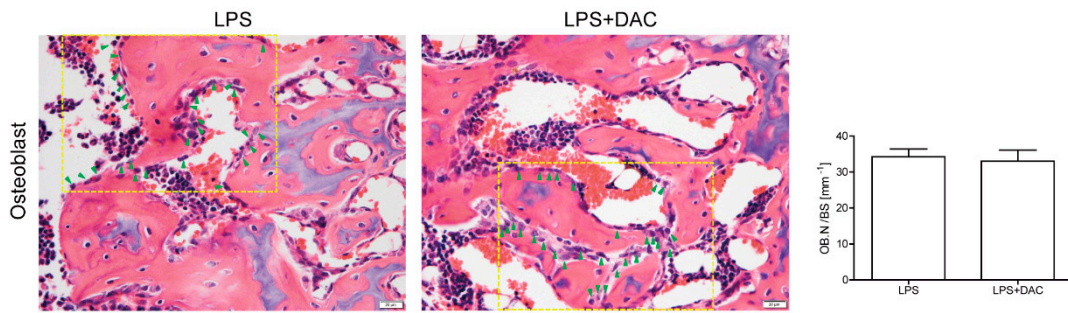

12

13 After H&E staining, OBs were identified to be “plump cuboidal cells with perinuclear clear zone  
 14 on osteoid surface” [1]. Representative histologic sections of distal femoral metaphysis of each group  
 15 were stained for H&E to identify OBs (green arrows in boxed area) (original magnification x400) with  
 16 OB.N/BS (OB number over total bone surface). Scale bar: 20  $\mu\text{m}$  in representative photos.

17

18 **Supplementary Figure 3.** WB images corresponding to Fig. 4.

**A**

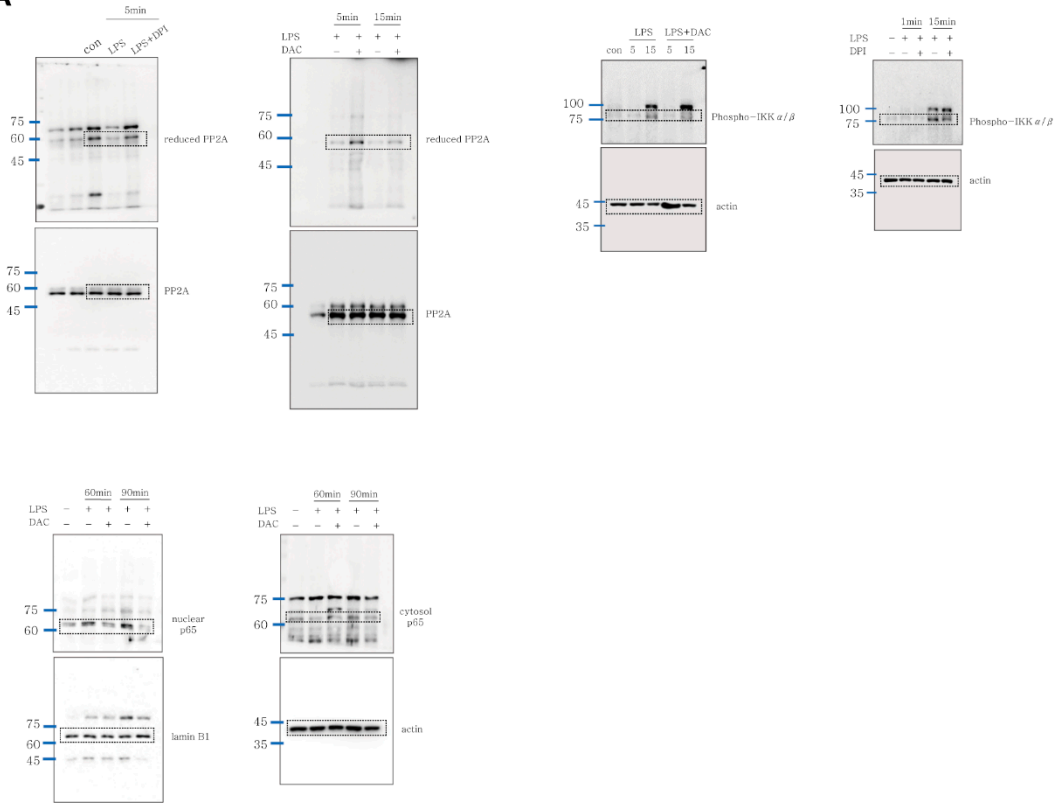

**B**

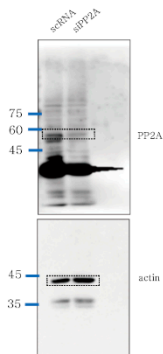

19

20

21 **Supplementary Figure 4.** DAC decreases differentiation of OCs upon RANKL stimulation *in vitro*.

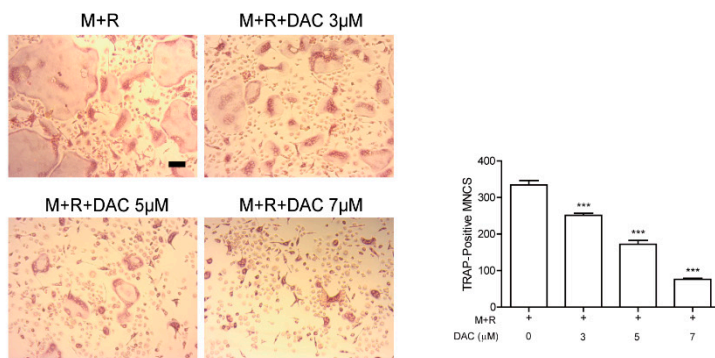

22

23 BMMs ( $10^4$  cells/well) were prepared and incubated with RANKL (40 ng/ml) and M-CSF (30 ng/ml)  
 24 in the absence or presence of DAC (3  $\mu$ M, 5  $\mu$ M, 7  $\mu$ M) for 72 h. Cells were fixed to count TRAP-  
 25 positive MNCs. \*\*\*  $p < 0.001$  compared with PBS-treated group.

26

27 [1] Jilka, RL.; Weinstein, RS.; Bellido, T.; Roberson, P.; Parfitt, AM.; et al. Increased bone formation by  
 28 prevention of osteoblast apoptosis with parathyroid hormone. *J Clin Invest.* **1999**, *104*, 439-446.

29
